# Supplementary material for: Adaptive dating and fast proposals: Revisiting the phylogenetic relaxed clock model
Source: PubMed Central journal article supplement (PMC7880504; doi:10.1371/journal.pcbi.1008322), 2021-02-02
Supplement: pcbi.1008322.s001.pdf [file pcbi.1008322.s001.pdf]

# Adaptive dating and fast proposals: revisiting the phylogenetic relaxed clock model

Jordan Douglas<sup>1,2\*</sup>, Rong Zhang<sup>1,2</sup>, Remco Bouckaert<sup>1,2,3</sup>

**1** Centre for Computational Evolution, University of Auckland, Auckland, New Zealand

**2** School of Computer Science, University of Auckland, Auckland, New Zealand

**3** Max Planck Institute for the Science of Human History, Jena, Germany

\* jordan.douglas@auckland.ac.nz

## S1 Appendix: Rate quantiles and operators

### 1 Piecewise linear approximation

In this article we introduced a linear piecewise approximation of the i-CDF (inverse cumulative distribution function) to improve the computational performance of the *quant* parameterisation. Let  $\hat{F}^{-1}(\mathcal{R}_i)$  be the piecewise approximation of the i-CDF  $F^{-1}(\mathcal{R}_i)$ . The approximation consists of  $n$  pieces (where  $n = 100$  is fixed). Due to the nonlinear nature of small and large quantiles in a log-normal distribution, the first and last pieces are not linear approximations but rather equal to the underlying distribution itself.

$$\hat{F}^{-1}(q) = \begin{cases} F^{-1}(q) & \text{if } q \leq \frac{1}{n} \text{ or } q \geq \frac{n-1}{n} \\ F^{-1}(\lfloor v \rfloor) + \left( F^{-1}(\lfloor v \rfloor + 1) - F^{-1}(\lfloor v \rfloor) \right) (v - \lfloor v \rfloor) & \text{otherwise.} \end{cases} \quad (1)$$

where  $v = q(n - 1)$  indexes quantile  $q$  into piece number  $\lfloor v \rfloor$ . Values from the underlying function  $F^{-1}$  are cached, enabling rapid computation.

### 2 Tree operators for rate quantiles

Zhang and Drummond 2020 introduced several tree operators for the *real* parameterisation – including `ConstantDistance`, `SimpleDistance`, and `SmallPulley` [1]. In this appendix, these three operators are extended to the *quant* parameterisation. Following the notation presented in the main article, let  $t_i$  be the time of node  $i$ , let  $0 < q_i < 1$  be the rate quantile of node  $i$ , and let  $r_i = \hat{F}^{-1}(q_i)$  be the real rate of node  $i$  where  $\hat{F}^{-1}$  is the linear approximation of the i-CDF.

## Constant Distance

Let  $\mathcal{X}$  be a uniformly-at-random sampled internal node on tree  $\mathcal{T}$ . Let  $\mathcal{L}$  and  $\mathcal{R}$  be the left and right child of  $\mathcal{X}$ , respectively, and let  $\mathcal{P}$  be the parent of  $\mathcal{X}$ . Under the *quant* parametrisation, the `ConstantDistance` operator works as follows:

Step 1. Propose a new height for  $t_{\mathcal{X}}$ :

$$t_{\mathcal{X}'} \leftarrow t_{\mathcal{X}} + s\Sigma \quad (2)$$

where  $\Sigma$  is drawn from a proposal transition distribution (Uniform or Bactrian), and  $s$  is a tunable step size. Ensure that  $\max\{t_{\mathcal{L}}, t_{\mathcal{R}}\} < t_{\mathcal{X}'} < t_{\mathcal{P}}$ , and if the constraint is broken then reject the proposal.

Step 2. Recalculate  $q_{\mathcal{X}}$  as:

$$\begin{aligned} q_{\mathcal{X}'} &\leftarrow \hat{F}(r_{\mathcal{X}'}) \\ &\leftarrow \hat{F}\left(\frac{t_{\mathcal{P}} - t_{\mathcal{X}}}{t_{\mathcal{P}} - t_{\mathcal{X}'}} r_{\mathcal{X}}\right) \\ &\leftarrow \hat{F}\left(\frac{t_{\mathcal{P}} - t_{\mathcal{X}}}{t_{\mathcal{P}} - t_{\mathcal{X}'}} F^{\hat{-1}}(q_{\mathcal{X}})\right). \end{aligned} \quad (3)$$

This ensures that the genetic distance between  $\mathcal{X}$  and  $\mathcal{P}$  remains constant after the operation by enforcing the constraint:

$$r_{\mathcal{X}}(t_{\mathcal{P}} - t_{\mathcal{X}}) = r_{\mathcal{X}'}(t_{\mathcal{P}} - t_{\mathcal{X}'}). \quad (4)$$

Step 3. Similarly, propose new rate quantiles for the two children  $\mathcal{C} \in \{\mathcal{L}, \mathcal{R}\}$ :

$$\begin{aligned} q_{\mathcal{C}'} &\leftarrow \hat{F}(r_{\mathcal{C}'}) \\ &\leftarrow \hat{F}\left(\frac{t_{\mathcal{X}} - t_{\mathcal{C}}}{t_{\mathcal{X}'} - t_{\mathcal{C}}} \times r_{\mathcal{C}}\right) \\ &\leftarrow \hat{F}\left(\frac{t_{\mathcal{X}} - t_{\mathcal{C}}}{t_{\mathcal{X}'} - t_{\mathcal{C}}} \times F^{\hat{-1}}(q_{\mathcal{C}})\right). \end{aligned} \quad (5)$$

Ensure that  $0 < q_i' < 1$  for all proposed nodes  $i \in \{\mathcal{X}, \mathcal{L}, \mathcal{R}\}$ , and if the constraint is broken then reject the proposal. This constraint can only be broken from numerical issues.

Step 4. Finally, in order to calculate the Metropolis-Hastings-Green ratio, return the determinant of the Jacobian matrix:

$$\begin{aligned}
J &= \begin{bmatrix} \frac{\partial t_{\mathcal{X}'}}{\partial t_{\mathcal{X}}} & \frac{\partial t_{\mathcal{X}'}}{\partial q_{\mathcal{X}}} & \frac{\partial t_{\mathcal{X}'}}{\partial q_{\mathcal{L}}} & \frac{\partial t_{\mathcal{X}'}}{\partial q_{\mathcal{R}}} \\ \frac{\partial q_{\mathcal{X}'}}{\partial t_{\mathcal{X}}} & \frac{\partial q_{\mathcal{X}'}}{\partial q_{\mathcal{X}}} & \frac{\partial q_{\mathcal{X}'}}{\partial q_{\mathcal{L}}} & \frac{\partial q_{\mathcal{X}'}}{\partial q_{\mathcal{R}}} \\ \frac{\partial t_{\mathcal{X}}}{\partial q_{\mathcal{L}'}} & \frac{\partial q_{\mathcal{X}}}{\partial q_{\mathcal{L}'}} & \frac{\partial q_{\mathcal{L}}}{\partial q_{\mathcal{L}'}} & \frac{\partial q_{\mathcal{R}}}{\partial q_{\mathcal{L}'}} \\ \frac{\partial t_{\mathcal{X}}}{\partial q_{\mathcal{R}'}} & \frac{\partial q_{\mathcal{X}}}{\partial q_{\mathcal{R}'}} & \frac{\partial q_{\mathcal{L}}}{\partial q_{\mathcal{R}'}} & \frac{\partial q_{\mathcal{R}}}{\partial q_{\mathcal{R}'}} \end{bmatrix} \\
&= \begin{bmatrix} \frac{\partial t_{\mathcal{X}'}}{\partial t_{\mathcal{X}}} & 0 & 0 & 0 \\ \frac{\partial q_{\mathcal{X}'}}{\partial t_{\mathcal{X}}} & \frac{\partial q_{\mathcal{X}'}}{\partial q_{\mathcal{X}}} & 0 & 0 \\ \frac{\partial t_{\mathcal{X}}}{\partial q_{\mathcal{L}'}} & 0 & \frac{\partial q_{\mathcal{L}}}{\partial q_{\mathcal{L}'}} & 0 \\ \frac{\partial t_{\mathcal{X}}}{\partial q_{\mathcal{R}'}} & 0 & 0 & \frac{\partial q_{\mathcal{R}}}{\partial q_{\mathcal{R}'}} \end{bmatrix}. \tag{6}
\end{aligned}$$

As  $J$  is triangular, its determinant  $|J|$  is equal to the product of diagonal elements:

$$\begin{aligned}
\ln |J| &= \ln \left\{ \frac{\partial t_{\mathcal{X}'}}{\partial t_{\mathcal{X}}} \times \frac{\partial q_{\mathcal{X}'}}{\partial q_{\mathcal{X}}} \times \frac{\partial q_{\mathcal{L}'}}{\partial q_{\mathcal{L}}} \times \frac{\partial q_{\mathcal{R}'}}{\partial q_{\mathcal{R}}} \right\} \\
&= \ln 1 + \ln D\hat{F} \left( \frac{t_{\mathcal{P}} - t_{\mathcal{X}}}{t_{\mathcal{P}} - t_{\mathcal{X}'}} \times F^{\hat{-1}}(q_{\mathcal{X}}) \right) + \ln \frac{\partial}{\partial q_{\mathcal{X}}} \frac{t_{\mathcal{P}} - t_{\mathcal{X}}}{t_{\mathcal{P}} - t_{\mathcal{X}'}} F^{\hat{-1}}(q_{\mathcal{X}}) \\
&\quad + \ln D\hat{F} \left( \frac{t_{\mathcal{X}} - t_{\mathcal{L}}}{t_{\mathcal{X}'} - t_{\mathcal{L}}} \times F^{\hat{-1}}(q_{\mathcal{L}}) \right) + \ln \frac{\partial}{\partial q_{\mathcal{L}}} \frac{t_{\mathcal{X}} - t_{\mathcal{L}}}{t_{\mathcal{X}'} - t_{\mathcal{L}}} F^{\hat{-1}}(q_{\mathcal{L}}) \\
&\quad + \ln D\hat{F} \left( \frac{t_{\mathcal{X}} - t_{\mathcal{R}}}{t_{\mathcal{X}'} - t_{\mathcal{R}}} \times F^{\hat{-1}}(q_{\mathcal{R}}) \right) + \ln \frac{\partial}{\partial q_{\mathcal{R}}} \frac{t_{\mathcal{X}} - t_{\mathcal{R}}}{t_{\mathcal{X}'} - t_{\mathcal{R}}} F^{\hat{-1}}(q_{\mathcal{R}}) \\
&= \ln D\hat{F} \left( \frac{t_{\mathcal{P}} - t_{\mathcal{X}}}{t_{\mathcal{P}} - t_{\mathcal{X}'}} \times F^{\hat{-1}}(q_{\mathcal{X}}) \right) + \ln DF^{\hat{-1}}(q_{\mathcal{X}}) + \ln \frac{t_{\mathcal{P}} - t_{\mathcal{X}}}{t_{\mathcal{P}} - t_{\mathcal{X}'}} \\
&\quad + \ln D\hat{F} \left( \frac{t_{\mathcal{X}} - t_{\mathcal{L}}}{t_{\mathcal{X}'} - t_{\mathcal{L}}} \times F^{\hat{-1}}(q_{\mathcal{L}}) \right) + \ln DF^{\hat{-1}}(q_{\mathcal{L}}) + \ln \frac{t_{\mathcal{X}} - t_{\mathcal{L}}}{t_{\mathcal{X}'} - t_{\mathcal{L}}} \\
&\quad + \ln D\hat{F} \left( \frac{t_{\mathcal{X}} - t_{\mathcal{R}}}{t_{\mathcal{X}'} - t_{\mathcal{R}}} \times F^{\hat{-1}}(q_{\mathcal{R}}) \right) + \ln DF^{\hat{-1}}(q_{\mathcal{R}}) + \ln \frac{t_{\mathcal{X}} - t_{\mathcal{R}}}{t_{\mathcal{X}'} - t_{\mathcal{R}}}. \tag{7}
\end{aligned}$$

The derivatives  $D\hat{F}$  and  $DF^{\hat{-1}}$  are computed using numerical approximations for the first and last pieces, or as the gradient of the linear approximation for internal pieces. As its final step, the operator returns  $\ln |J|$ .

## Simple Distance

While `ConstantDistance` proposes internal node heights, `SimpleDistance` operates on the root. Let  $\mathcal{X}$  be the root node and let  $\mathcal{L}$  and  $\mathcal{R}$  be its two children.

Step 1. Propose a new height for  $t_{\mathcal{X}}$ :

$$t_{\mathcal{X}'} \leftarrow t_{\mathcal{X}} + s\Sigma. \tag{8}$$

Ensure that  $\max\{t_{\mathcal{L}}, t_{\mathcal{R}}\} < t_{\mathcal{X}'}$ , and if the constraint is broken then reject the proposal.

Step 2. Propose new rate quantiles for the two children  $\mathcal{C} \in \{\mathcal{L}, \mathcal{R}\}$ :

$$\begin{aligned}
q_{\mathcal{C}'} &\leftarrow \hat{F}(r_{\mathcal{C}'}) \\
&\leftarrow \hat{F}\left(\frac{t_{\mathcal{X}} - t_{\mathcal{C}}}{t_{\mathcal{X}'} - t_{\mathcal{C}}} \times r_{\mathcal{C}}\right) \\
&\leftarrow \hat{F}\left(\frac{t_{\mathcal{X}} - t_{\mathcal{C}}}{t_{\mathcal{X}'} - t_{\mathcal{C}}} \times F^{\hat{-}1}(q_{\mathcal{C}})\right).
\end{aligned} \tag{9}$$

These proposals ensure that the genetic distance between  $\mathcal{X}$  and its children  $\mathcal{C}$  remain constant after the operation by enforcing the constraint:

$$r_{\mathcal{C}}(t_{\mathcal{X}} - t_{\mathcal{C}}) = r_{\mathcal{C}'}(t_{\mathcal{X}'} - t_{\mathcal{C}}). \tag{10}$$

Ensure that  $0 < q_{\mathcal{C}'} < 1$ , and if the constraint is broken then reject the proposal.

Step 3. Finally, in order to calculate the Metropolis-Hastings-Green ratio, return the determinant of the Jacobian matrix:

$$\begin{aligned}
J &= \begin{bmatrix} \frac{\partial t_{\mathcal{X}'}}{\partial t_{\mathcal{X}}} & \frac{\partial t_{\mathcal{X}'}}{\partial q_{\mathcal{L}}} & \frac{\partial t_{\mathcal{X}'}}{\partial q_{\mathcal{R}}} \\ \frac{\partial q_{\mathcal{L}'}}{\partial t_{\mathcal{X}}} & \frac{\partial q_{\mathcal{L}'}}{\partial q_{\mathcal{L}}} & \frac{\partial q_{\mathcal{L}'}}{\partial q_{\mathcal{R}}} \\ \frac{\partial q_{\mathcal{R}'}}{\partial t_{\mathcal{X}}} & \frac{\partial q_{\mathcal{R}'}}{\partial q_{\mathcal{L}}} & \frac{\partial q_{\mathcal{R}'}}{\partial q_{\mathcal{R}}} \end{bmatrix} \\
&= \begin{bmatrix} \frac{\partial t_{\mathcal{X}'}}{\partial t_{\mathcal{X}}} & 0 & 0 \\ \frac{\partial q_{\mathcal{L}'}}{\partial t_{\mathcal{X}}} & \frac{\partial q_{\mathcal{L}'}}{\partial q_{\mathcal{L}}} & 0 \\ \frac{\partial q_{\mathcal{R}'}}{\partial t_{\mathcal{X}}} & 0 & \frac{\partial q_{\mathcal{R}'}}{\partial q_{\mathcal{R}}} \end{bmatrix}.
\end{aligned} \tag{11}$$

As  $J$  is triangular, its determinant  $|J|$  is equal to the product of diagonal elements:

$$\begin{aligned}
\ln |J| &= \ln \left\{ \frac{\partial t_{\mathcal{X}'}}{\partial t_{\mathcal{X}}} \times \frac{\partial q_{\mathcal{L}'}}{\partial q_{\mathcal{L}}} \times \frac{\partial q_{\mathcal{R}'}}{\partial q_{\mathcal{R}}} \right\} \\
&= \ln \frac{\partial t_{\mathcal{X}'}}{\partial t_{\mathcal{X}}} + \ln \frac{\partial q_{\mathcal{L}'}}{\partial q_{\mathcal{L}}} + \ln \frac{\partial q_{\mathcal{R}'}}{\partial q_{\mathcal{R}}} \\
&= \ln 1 \\
&\quad + \ln D\hat{F}\left(\frac{t_{\mathcal{X}} - t_{\mathcal{L}}}{t_{\mathcal{X}'} - t_{\mathcal{L}}} \times F^{\hat{-}1}(q_{\mathcal{L}})\right) + \ln \frac{\partial}{\partial q_{\mathcal{L}}} \frac{t_{\mathcal{X}} - t_{\mathcal{L}}}{t_{\mathcal{X}'} - t_{\mathcal{L}}} F^{\hat{-}1}(q_{\mathcal{L}}) \\
&\quad + \ln D\hat{F}\left(\frac{t_{\mathcal{X}} - t_{\mathcal{R}}}{t_{\mathcal{X}'} - t_{\mathcal{R}}} \times F^{\hat{-}1}(q_{\mathcal{R}})\right) + \ln \frac{\partial}{\partial q_{\mathcal{R}}} \frac{t_{\mathcal{X}} - t_{\mathcal{R}}}{t_{\mathcal{X}'} - t_{\mathcal{R}}} F^{\hat{-}1}(q_{\mathcal{R}}) \\
&= \ln D\hat{F}\left(\frac{t_{\mathcal{X}} - t_{\mathcal{L}}}{t_{\mathcal{X}'} - t_{\mathcal{L}}} \times F^{\hat{-}1}(q_{\mathcal{L}})\right) + \ln DF^{\hat{-}1}(q_{\mathcal{L}}) + \ln \frac{t_{\mathcal{X}} - t_{\mathcal{L}}}{t_{\mathcal{X}'} - t_{\mathcal{L}}} \\
&\quad + \ln D\hat{F}\left(\frac{t_{\mathcal{X}} - t_{\mathcal{R}}}{t_{\mathcal{X}'} - t_{\mathcal{R}}} \times F^{\hat{-}1}(q_{\mathcal{R}})\right) + \ln DF^{\hat{-}1}(q_{\mathcal{R}}) + \ln \frac{t_{\mathcal{X}} - t_{\mathcal{R}}}{t_{\mathcal{X}'} - t_{\mathcal{R}}}.
\end{aligned} \tag{12}$$

As its final step, the operator returns  $\ln |J|$ .

## Small Pulley

Just like the previous operator, `SmallPulley` operates on the root. Let  $\mathcal{X}$  be the root node and let  $\mathcal{L}$  and  $\mathcal{R}$  be its two children. However, unlike `SimpleDistance`, this operator alters the two genetic distances  $d_{\mathcal{L}} = r_{\mathcal{L}}(t_{\mathcal{X}} - t_{\mathcal{L}}) = F^{\hat{-1}}(q_{\mathcal{L}})(t_{\mathcal{X}} - t_{\mathcal{L}})$  and  $d_{\mathcal{R}} = r_{\mathcal{R}}(t_{\mathcal{X}} - t_{\mathcal{R}}) = F^{\hat{-1}}(q_{\mathcal{R}})(t_{\mathcal{X}} - t_{\mathcal{R}})$ , while conserving their sum  $d_{\mathcal{L}} + d_{\mathcal{R}}$ .

Step 1. Propose new genetic distances for  $d_{\mathcal{L}}$  and  $d_{\mathcal{R}}$ :

$$d_{\mathcal{L}}' \leftarrow d_{\mathcal{L}} + s\Sigma \quad (13)$$

$$d_{\mathcal{R}}' \leftarrow d_{\mathcal{R}} - s\Sigma \quad (14)$$

Ensure that  $0 < d_{\mathcal{L}}' < d_{\mathcal{L}} + d_{\mathcal{R}}$ , and if the constraint is broken then reject the proposal.

Step 2. Propose new rate quantiles for the two children  $\mathcal{L}$  and  $\mathcal{R}$ :

$$\begin{aligned} q_{\mathcal{L}}' &\leftarrow \hat{F}\left(\frac{d_{\mathcal{L}}'}{t_{\mathcal{X}} - t_{\mathcal{L}}}\right) \\ &\leftarrow \hat{F}\left(\frac{F^{\hat{-1}}(q_{\mathcal{L}})(t_{\mathcal{X}} - t_{\mathcal{L}}) + \Sigma}{t_{\mathcal{X}} - t_{\mathcal{L}}}\right) \end{aligned} \quad (15)$$

$$\begin{aligned} q_{\mathcal{R}}' &\leftarrow \hat{F}\left(\frac{d_{\mathcal{R}}'}{t_{\mathcal{X}} - t_{\mathcal{R}}}\right) \\ &\leftarrow \hat{F}\left(\frac{F^{\hat{-1}}(q_{\mathcal{R}})(t_{\mathcal{X}} - t_{\mathcal{R}}) - \Sigma}{t_{\mathcal{X}} - t_{\mathcal{R}}}\right). \end{aligned} \quad (16)$$

Step 3. Return the determinant of the Jacobian matrix:

$$\begin{aligned} J &= \begin{bmatrix} \frac{\partial q_{\mathcal{L}}'}{\partial q_{\mathcal{L}}} & \frac{\partial q_{\mathcal{L}}'}{\partial q_{\mathcal{R}}} \\ \frac{\partial q_{\mathcal{R}}'}{\partial q_{\mathcal{L}}} & \frac{\partial q_{\mathcal{R}}'}{\partial q_{\mathcal{R}}} \end{bmatrix} \\ &= \begin{bmatrix} \frac{\partial q_{\mathcal{L}}'}{\partial q_{\mathcal{L}}} & 0 \\ 0 & \frac{\partial q_{\mathcal{R}}'}{\partial q_{\mathcal{R}}} \end{bmatrix}. \end{aligned} \quad (17)$$

As  $J$  is triangular/diagonal, its determinant  $|J|$  is equal to the product of diagonal elements:

$$\begin{aligned}
\ln |J| &= \ln \left\{ \frac{\partial q_{\mathcal{L}}'}{\partial q_{\mathcal{L}}} \times \frac{\partial q_{\mathcal{R}}'}{\partial q_{\mathcal{R}}} \right\} \\
&= \ln \frac{\partial q_{\mathcal{L}}'}{\partial q_{\mathcal{L}}} + \ln \frac{\partial q_{\mathcal{R}}'}{\partial q_{\mathcal{R}}} \\
&= \ln D\hat{F} \left( \frac{F^{\hat{-1}}(q_{\mathcal{L}})(t_{\mathcal{X}} - t_{\mathcal{L}}) + \Sigma}{t_{\mathcal{X}} - t_{\mathcal{L}}} \right) + \ln \frac{\partial q_{\mathcal{L}}'}{\partial q_{\mathcal{L}}} \frac{F^{\hat{-1}}(q_{\mathcal{L}})(t_{\mathcal{X}} - t_{\mathcal{L}}) + \Sigma}{t_{\mathcal{X}} - t_{\mathcal{L}}} \\
&\quad + \ln D\hat{F} \left( \frac{F^{\hat{-1}}(q_{\mathcal{R}})(t_{\mathcal{X}} - t_{\mathcal{R}}) - \Sigma}{t_{\mathcal{X}} - t_{\mathcal{R}}} \right) + \ln \frac{\partial q_{\mathcal{R}}'}{\partial q_{\mathcal{R}}} \frac{F^{\hat{-1}}(q_{\mathcal{R}})(t_{\mathcal{X}} - t_{\mathcal{R}}) - \Sigma}{t_{\mathcal{X}} - t_{\mathcal{R}}} \\
&= \ln D\hat{F} \left( \frac{F^{\hat{-1}}(q_{\mathcal{L}})(t_{\mathcal{X}} - t_{\mathcal{L}}) + \Sigma}{t_{\mathcal{X}} - t_{\mathcal{L}}} \right) + \ln DF^{\hat{-1}}(q_{\mathcal{L}}) \\
&\quad + \ln D\hat{F} \left( \frac{F^{\hat{-1}}(q_{\mathcal{R}})(t_{\mathcal{X}} - t_{\mathcal{R}}) - \Sigma}{t_{\mathcal{X}} - t_{\mathcal{R}}} \right) + \ln DF^{\hat{-1}}(q_{\mathcal{R}}). \tag{18}
\end{aligned}$$

Thus, as its final step, the operator returns  $\ln |J|$ .

### 3 CisScale operator

CisScale was originally introduced by Zhang and Drummond 2020 for the *real* parameterisation (therein named `ucldstdevScaleOperator`). Under the *quant* configuration, the CisScale operator works as follows.

Step 1. Propose a new value for the relaxed clock standard deviation  $\sigma$

$$\sigma' \leftarrow \sigma \times e^{s\Sigma}. \quad (19)$$

Step 2. Recalculate all branch substitution rate quantiles  $q$  such that their rates  $r$  remain constant

$$\text{let } r = \hat{F}^{-1}(q|\sigma) \quad (20)$$

$$\text{let } r' = r \quad (21)$$

$$q' \leftarrow \hat{F}(r'|\sigma') = \hat{F}(\hat{F}^{-1}(q|\sigma)|\sigma'). \quad (22)$$

Step 3. Return the log Hastings-Green ratio of this proposal. If  $\Sigma$  was drawn from a symmetric proposal kernel (such as the Bactrian distribution), this is equal to:

$$|J| = \log(e^{s\Sigma}) + \log\left(\frac{\delta}{\delta q} \hat{F}(\hat{F}^{-1}(q|\sigma)|\sigma')\right) \quad (23)$$

$$= s\Sigma + \log D\hat{F}(\hat{F}^{-1}(q|\sigma)|\sigma') + \log D\hat{F}^{-1}(q|\sigma), \quad (24)$$

where derivatives  $D\hat{F}$  and  $D\hat{F}^{-1}$  can be approximated using either the piecewise linear model or standard numerical libraries.

## 4 Narrow exchange rates

The `NarrowExchangeRate` operator is also compatible with rate quantiles. This operator behaves the same as presented in the main article however the Hastings-Green ratio requires further augmentation due to changes in dimension throughout the proposal.

Step 1. Apply `NarrowExchange` to the current tree topology as described in the main article. This will return a Hastings ratio  $H$  due to the asymmetry of this proposal.

Step 2. Compute the relevant branch rates  $r_i$  for  $r \in \{A, B, C, D\}$  of the current state from their respective quantile parameters.

$$r_i = \hat{F}^{-1}(q_i). \quad (25)$$

Step 3. Propose new rates and node heights and compute the Hastings-Green ratio of the real-space component of the proposal (e.g. Algorithms 1-2 of the main article).

$$(r'_A, r'_B, r'_C, r'_D, t'_D, |J_r|) \leftarrow \text{PROPOSAL}(r_A, r_B, r_C, r_D, t_D). \quad (26)$$

Step 4. Transform the rates back into quantiles.

$$q'_i = \hat{F}(r'_i). \quad (27)$$

Step 5. Compute the log Hastings-Green ratio of the interconversion between rates and quantiles.

$$\log |J_q| = \log \hat{F}(q) + \log \hat{F}^{-1}(r'). \quad (28)$$

Step 6. Return the total log Hastings-Green ratio of this proposal:  $\log H + \log |J_r| + \log |J_q|$ .



## 5 Summary of proposal kernels

Operators whose proposal kernels are affected by the decision to use a Bactrian kernel, as opposed to a uniform kernel, are specified below.

|   | Operator(s)                        | Proposal                                                                         | Parameter $x$               |
|---|------------------------------------|----------------------------------------------------------------------------------|-----------------------------|
| 1 | RandomWalk                         | $x' \leftarrow x + s\Sigma$                                                      | $\vec{\mathcal{R}}, \sigma$ |
| 2 | Scale                              | $x' \leftarrow x \times e^{s\Sigma}$                                             | $\vec{\mathcal{R}}, \sigma$ |
| 3 | Interval                           | $y \leftarrow \frac{1-x}{x} \times e^{s\Sigma}$<br>$x' \leftarrow \frac{y}{y+1}$ | $\vec{\mathcal{R}}$         |
| 4 | ConstantDistance<br>SimpleDistance | $x' \leftarrow x + s\Sigma$                                                      | $t$                         |
| 5 | SmallPulley                        | $x' \leftarrow x + s\Sigma$                                                      | $\vec{\mathcal{R}}$         |
| 6 | CisScale                           | $x' \leftarrow x \times e^{s\Sigma}$                                             | $\sigma$                    |

Table 1: Proposal kernels  $q(x'|x)$  of clock model operators. In each operator,  $\Sigma$  is drawn from either a Bactrian( $m$ ) or uniform distribution. The scale size  $s$  is tunable. **ConstantDistance** and **SimpleDistance** propose tree heights  $t$ . The **Interval** operator applies to rate quantiles and respects its domain i.e.  $0 < x, x' < 1$ .

## 6 Supplementary NER Algorithm

A second NER algorithm is presented below. This operator was rejected by the screening protocol on simulated data.

---

**Algorithm 1** The  $\text{NER}\{\mathcal{D}_{BC}, \mathcal{D}_{CE}\}$  operator.

---

```

1: procedure PROPOSAL( $t_A, t_B, t_C, t_D, t_E, r_A, r_B, r_C, r_D$ )
2:
3:    $s\Sigma \leftarrow \text{getRandomWalkSize}()$             $\triangleright$  Random walk size is 0 unless this is NERw
4:    $t'_D \leftarrow t_D + s\Sigma$                       $\triangleright$  Propose new node height for  $D$ 
5:
6:    $r'_A \leftarrow r_A$                                 $\triangleright$  Propose new rates
7:    $r'_B \leftarrow \frac{r_B(t_D - t_B) + r_D(t_E - t_D) + r_D(t_E - t'_D)}{t'_D - t_B}$ 
8:    $r'_C \leftarrow \frac{r_C(t_E - t_C) - r_D(t_E - t'_D)}{t'_D - t_C}$ 
9:    $r'_D \leftarrow r_D$ 
10:
11:   $|J| \leftarrow \frac{(t_D - t_B)(t_E - t_C)}{(t'_D - t_B)(t'_D - t_C)}$             $\triangleright$  Calculate Jacobian determinant
12:  return ( $r'_A, r'_B, r'_C, r'_D, t'_D, |J|$ )

```

---

## References

- [1] Zhang R, Drummond A. Improving the performance of Bayesian phylogenetic inference under relaxed clock models. *BMC Evolutionary Biology*. 2020;20:1–28.
