# Supplementary material for: Adaptive dating and fast proposals: Revisiting the phylogenetic relaxed clock model
Source: PubMed Central journal article supplement (PMC7880504; doi:10.1371/journal.pcbi.1008322), 2021-02-02

**cons(*quant*) vs. nocons(*quant*)**

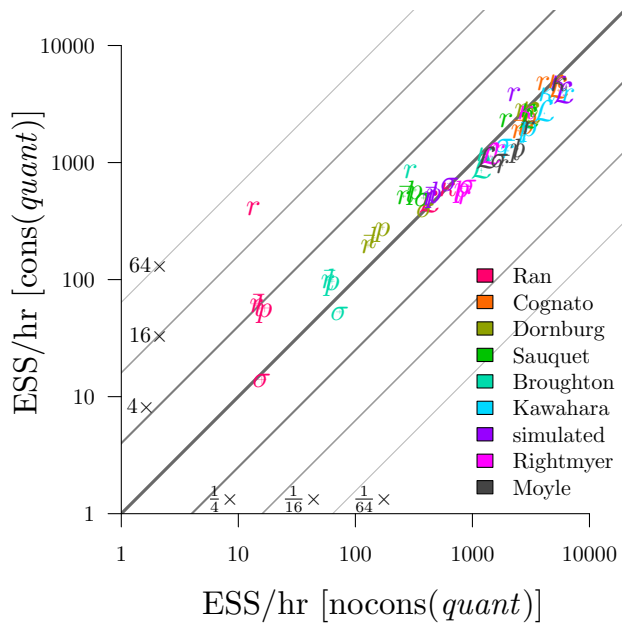

**adapt(*quant*) vs. nocons(*quant*)**

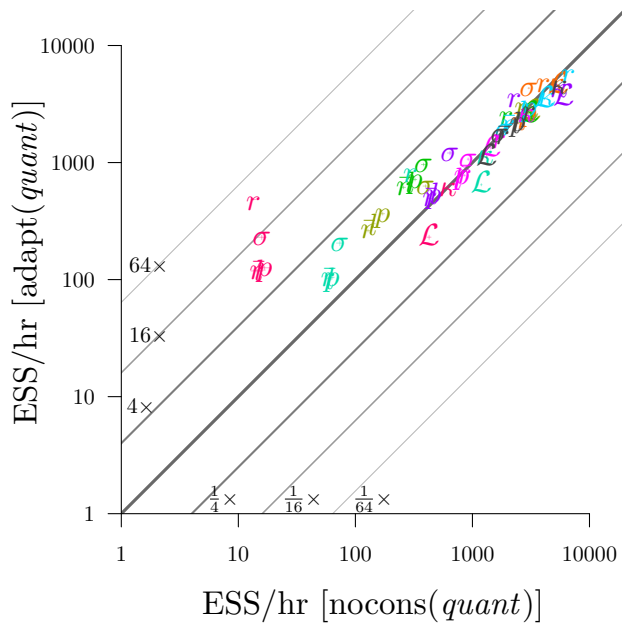

**adapt(*quant*) vs. cons(*quant*)**

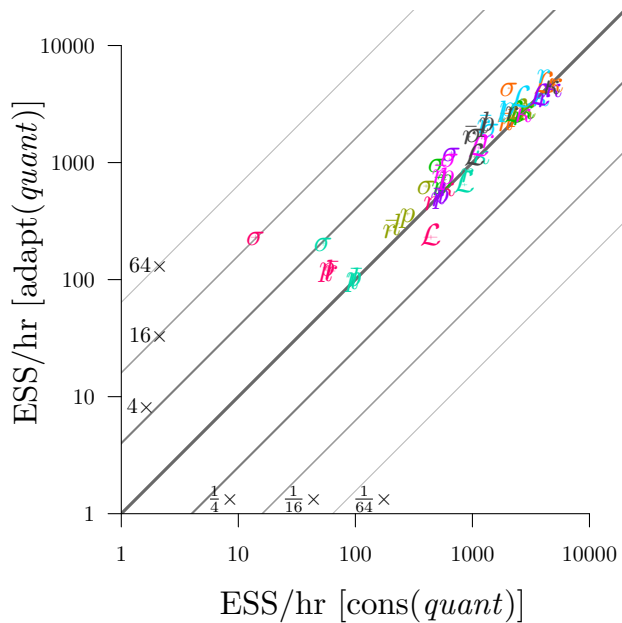

**adapt(*cat*) vs. *cat***

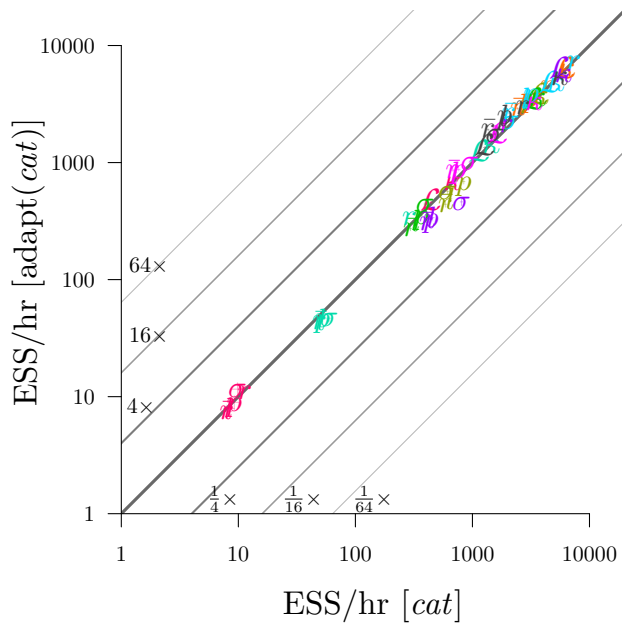

Supplement: pcbi.1008322.s003.pdf [file pcbi.1008322.s003.pdf]
